# Supplementary material for: Mismatch between coccolithophore-based estimates of particulate inorganic carbon (PIC) concentration and satellite-derived PIC concentration in the Pacific Southern Ocean
Source: Copernicus journal article supplement (doi:10.5194/bg-22-3143-2025), 2025-07-02
Supplement: Supplementary file 1 [file bg-22-3143-2025-supplement.zip]

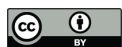

## *Supplement of*

# **Mismatch between coccolithophore-based estimates of particulate inorganic carbon (PIC) concentration and satellite-derived PIC concentration in the Pacific Southern Ocean**

**Mariem Saavedra-Pellitero et al.**

*Correspondence to:* Mariem Saavedra-Pellitero ([mariem.saavedra-pellitero@port.ac.uk](mailto:mariem.saavedra-pellitero@port.ac.uk))

- [bg-22-3143-2025-supplement-title-page.pdf](#)
- [Supplementary material\\_figures\\_and\\_table\\_captions\\_after\\_2nd\\_reviews.docx](#)
- [Table\\_S1\\_EhuxMorph\\_mass\\_NZ.xls](#)
- [Table\\_S2\\_PS97\\_Ehux\\_Morph\\_mass.xls](#)
- [Table\\_S3\\_Cleptoporus\\_morphometries\\_NZ.xls](#)
- [Table\\_S4\\_\\_PS97\\_Drake\\_Passage\\_Ehux\\_lith\\_no.xls](#)

The copyright of individual parts of the supplement might differ from the article licence.
